# Supplementary material for: Tris(indolyl)methene molecule as an anion receptor and colorimetric chemosensor: tunable selectivity and sensitivity for anions
Source: Royal Society of Chemistry journal article supplement (doi:10.1039/c0ob00472c), 2010-10-09
Supplement: c0ob00472c.pdf [file c0ob00472c.pdf]

## Electronic supporting information:

# Tris(indolyl)methene molecule as an anion receptor and colorimetric chemosensor: tunable selectivity and sensitivity for anions

Litao Wang<sup>a,c</sup>, Xiaoming He<sup>a,c</sup>, Yong Guo<sup>a</sup>, Jian Xu<sup>a</sup>, Shijun Shao<sup>\*,a,b</sup>

<sup>a</sup> Key Laboratory of Chemistry of Northwestern Plant Resources and Key Laboratory for Natural Medicine of Gansu Province, Lanzhou Institute of Chemical Physics, Chinese Academy of Sciences, Lanzhou 730000, P. R. China

<sup>b</sup> State Key Laboratory for Oxo Synthesis and Selective Oxidation, Lanzhou Institute of Chemical Physics, Chinese Academy of Sciences, Lanzhou 730000, P. R. China

<sup>c</sup> Graduate School of the Chinese Academy of Sciences, Beijing 100039, P. R. China

[sjshao@licp.cas.cn](mailto:sjshao@licp.cas.cn)

This work was supported by the National Natural Science Foundational of China (Grant No. 0672121) and the open fund of State Key Laboratory of Oxo Synthesis & Selective Oxidation (Grant No. OSSO2008kjk6).

|                                                                                                                                                                                                                                                                                                                                                                                                |           |
|------------------------------------------------------------------------------------------------------------------------------------------------------------------------------------------------------------------------------------------------------------------------------------------------------------------------------------------------------------------------------------------------|-----------|
| General methods.....                                                                                                                                                                                                                                                                                                                                                                           | 3         |
| <b>Fig. S1</b> The changes in UV-vis spectra of <b>1</b> recorded in CH <sub>3</sub> CN (2.5×10 <sup>-5</sup> M) after addition of: (a) 0, 0.2, 0.6, 1 equiv. of OH <sup>-</sup> ; (b) 1, 5, 10, 15, 20, 25, 30, 35 equiv. of OH <sup>-</sup> ; (c) 35, 40, 45, 50, 55, 60, 80, 100 equiv. of OH <sup>-</sup> .....                                                                            | 4         |
| <b>Fig. S2.</b> Changes in UV-Vis spectra of <b>1</b> +200 equiv F <sup>-</sup> recorded in CH <sub>3</sub> CN (2.5×10 <sup>-5</sup> M) after addition of (a) 0, 1 (328.4 equiv), 2, 3, 4 μL of CH <sub>3</sub> OH; (b) 5, 6, 7, 10, 12.5, 15, 17.5, 20, 22.5, 25, 27.5, 30, 32.5, 35, 37.5 μL of CH <sub>3</sub> OH.....                                                                      | 4         |
| <b>Fig. S3.</b> UV-vis spectra of <b>1</b> recorded in CH <sub>3</sub> CN (2.5×10 <sup>-5</sup> M) after addition of 25 equiv of various anions (none, F <sup>-</sup> , AcO <sup>-</sup> , Cl <sup>-</sup> , Br <sup>-</sup> , I <sup>-</sup> , HSO <sub>4</sub> <sup>-</sup> , ClO <sub>4</sub> <sup>-</sup> , H <sub>2</sub> PO <sub>4</sub> <sup>-</sup> ).....                             | 4         |
| <b>Fig. S4.</b> UV-vis spectra of <b>1</b> (2.5×10 <sup>-5</sup> M) recorded in CH <sub>3</sub> CN/H <sub>2</sub> O (4:1, v/v) after addition of 25 equiv of various anions (none, F <sup>-</sup> , AcO <sup>-</sup> , Cl <sup>-</sup> , Br <sup>-</sup> , I <sup>-</sup> , HSO <sub>4</sub> <sup>-</sup> , ClO <sub>4</sub> <sup>-</sup> , H <sub>2</sub> PO <sub>4</sub> <sup>-</sup> )..... | 5         |
| <b>Fig. S5.</b> UV-vis spectra of <b>1</b> recorded in DMSO (2.5×10 <sup>-5</sup> M) after addition of 25 equiv of various anions (none, F <sup>-</sup> , AcO <sup>-</sup> , Cl <sup>-</sup> , Br <sup>-</sup> , I <sup>-</sup> , HSO <sub>4</sub> <sup>-</sup> , ClO <sub>4</sub> <sup>-</sup> , H <sub>2</sub> PO <sub>4</sub> <sup>-</sup> ).....                                           | 5         |
| <b>Fig. S6.</b> <sup>1</sup> H NMR titration spectra of receptor <b>2</b> (2.5 ×10 <sup>-2</sup> M) in DMSO- <i>d</i> <sub>6</sub> solution with F <sup>-</sup> (0, 0.5, 1, 2, 4, 8 equiv) and F <sup>-</sup> alone (bottom), the dashed lines track the shift of the H <sub>1</sub> and H <sub>3</sub> signals.....                                                                           | 5         |
| <b>Fig. S7.</b> UV-vis spectra of <b>2</b> recorded in CH <sub>3</sub> CN (2.5×10 <sup>-5</sup> M) after addition of 25 equiv of various anions (none, F <sup>-</sup> , AcO <sup>-</sup> , Cl <sup>-</sup> , Br <sup>-</sup> , I <sup>-</sup> , HSO <sub>4</sub> <sup>-</sup> , ClO <sub>4</sub> <sup>-</sup> , H <sub>2</sub> PO <sub>4</sub> <sup>-</sup> ).....                             | 6         |
| <b>Fig. S8.</b> The changes in UV-vis spectra of <b>2</b> recorded in CH <sub>3</sub> CN (2.5×10 <sup>-5</sup> M) after addition of: (a) 0, 2, 4, 6, 8, 10, 15, 20, 30, 40, 60 equiv of F <sup>-</sup> ; (b) 60, 80, 100, 120, 140, 160, 180, 200 equiv of F <sup>-</sup> .....                                                                                                                | 6         |
| <b>Fig. S9.</b> The changes in UV-vis spectra of <b>2</b> (2.5×10 <sup>-5</sup> M) measured in MeCN after addition of (a) 0, 0.5, 1, 2 equiv of AcO <sup>-</sup> ; (b) 2, 10, 30, 60, 100, 150, 200 equiv of AcO <sup>-</sup> .....                                                                                                                                                            | 6         |
| <b>Fig. S10.</b> The changes in UV-vis spectra of <b>2</b> (2.5×10 <sup>-5</sup> M) measured in MeCN after addition of (a) 0, 0.5, 1, 2 equiv of H <sub>2</sub> PO <sub>4</sub> <sup>-</sup> ; (b) 2, 10, 50, 100, 200 equiv of H <sub>2</sub> PO <sub>4</sub> <sup>-</sup> .....                                                                                                              | 7         |
| <b>Fig. S11.</b> The changes in UV-vis spectra of <b>3</b> recorded in CH <sub>3</sub> CN (2.5×10 <sup>-5</sup> M) after addition of: (a) 0, 0.2, 0.4 equiv of F <sup>-</sup> ; (b) 0.4, 0.6, 0.8, 1, 1.2, 1.4, 1.6, 1.8, 2 equiv of F <sup>-</sup> ; (c) 2, 2.5, 3, 3.5, 4, 6, 8, 10, 20, 50, 100 equiv of F <sup>-</sup> .....                                                               | 7         |
| <b>The Job's plots and the equilibrium constants of receptors 1-3 with three basic anions.....</b>                                                                                                                                                                                                                                                                                             | <b>8</b>  |
| <b><sup>1</sup>H NMR spectra of 1-3.....</b>                                                                                                                                                                                                                                                                                                                                                   | <b>11</b> |
| <b><sup>13</sup>C NMR spectra of 1-3.....</b>                                                                                                                                                                                                                                                                                                                                                  | <b>14</b> |
| <b>References:.....</b>                                                                                                                                                                                                                                                                                                                                                                        | <b>15</b> |

## General methods

$^1\text{H}$  NMR spectra were recorded at 400 MHz with TMS as an internal standard. High resolution mass spectra were obtained by Fourier-transform ion cyclotron resonance mass spectrometer, all new compounds were further characterized by HRMS. Melting points are uncorrected. UV-vis spectra were recorded at room temperature. The tetra-n-butylammonium fluoride was purchased from Fluka, the other tetra-n-butylammonium ( $\text{Bu}_4\text{N}^+$ ) salts of different anions were purchased from Alfa Aesar.  $\text{CH}_3\text{CN}$  was used the chromatographically pure.

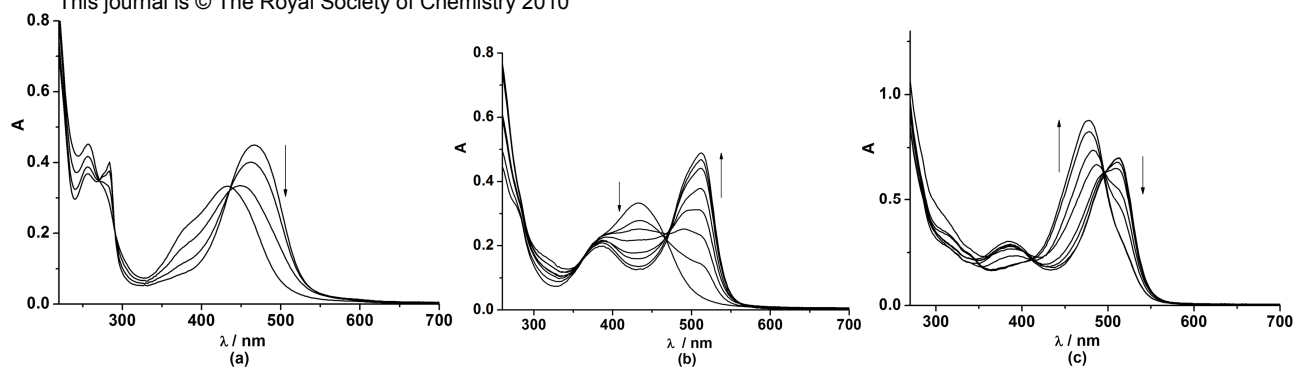

**Fig. S1** The changes in UV-vis spectra of **1** recorded in  $\text{CH}_3\text{CN}$  ( $2.5 \times 10^{-5}$  M) after addition of: (a) 0, 0.2, 0.6, 1 equiv. of  $\text{OH}^-$ ; (b) 1, 5, 10, 15, 20, 25, 30, 35 equiv. of  $\text{OH}^-$ ; (c) 35, 40, 45, 50, 55, 60, 80, 100 equiv. of  $\text{OH}^-$ .

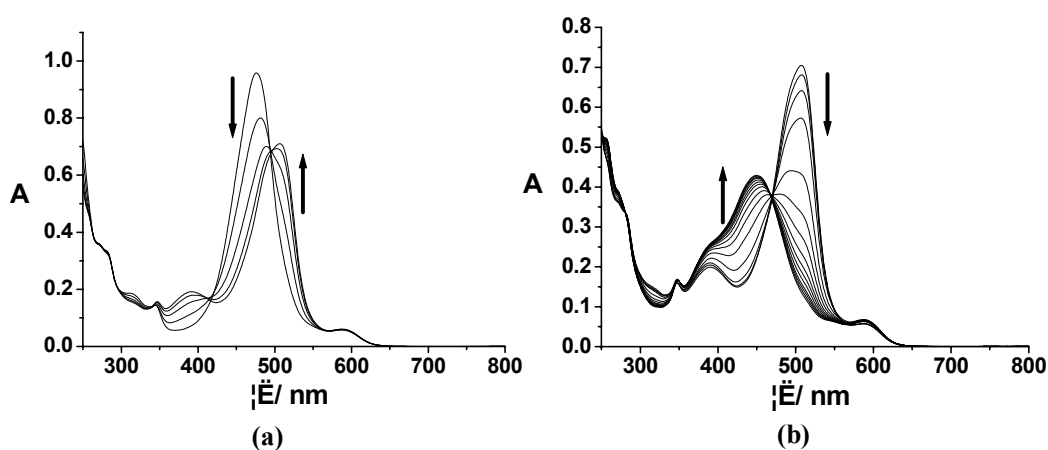

**Fig. S2.** Changes in UV-Vis spectra of **1** + 200 equiv  $\text{F}^-$  recorded in  $\text{CH}_3\text{CN}$  ( $2.5 \times 10^{-5}$  M) after addition of (a) 0, 1 (328.4 equiv), 2, 3, 4  $\mu\text{L}$  of  $\text{CH}_3\text{OH}$ ; (b) 5, 6, 7, 10, 12.5, 15, 17.5, 20, 22.5, 25, 27.5, 30, 32.5, 35, 37.5  $\mu\text{L}$  of  $\text{CH}_3\text{OH}$ .

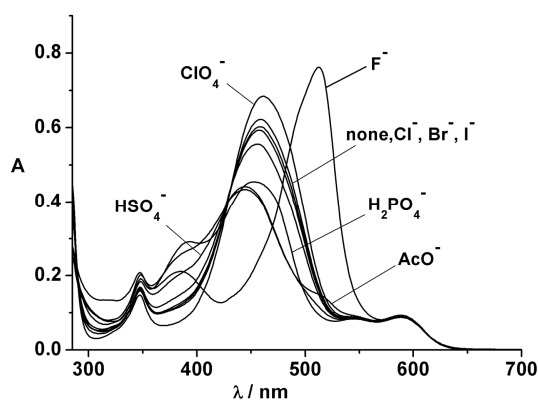

**Fig. S3.** UV-vis spectra of **1** recorded in  $\text{CH}_3\text{CN}$  ( $2.5 \times 10^{-5}$  M) after addition of 25 equiv of various anions (none,  $\text{F}^-$ ,  $\text{AcO}^-$ ,  $\text{Cl}^-$ ,  $\text{Br}^-$ ,  $\text{I}^-$ ,  $\text{HSO}_4^-$ ,  $\text{ClO}_4^-$ ,  $\text{H}_2\text{PO}_4^-$ ).

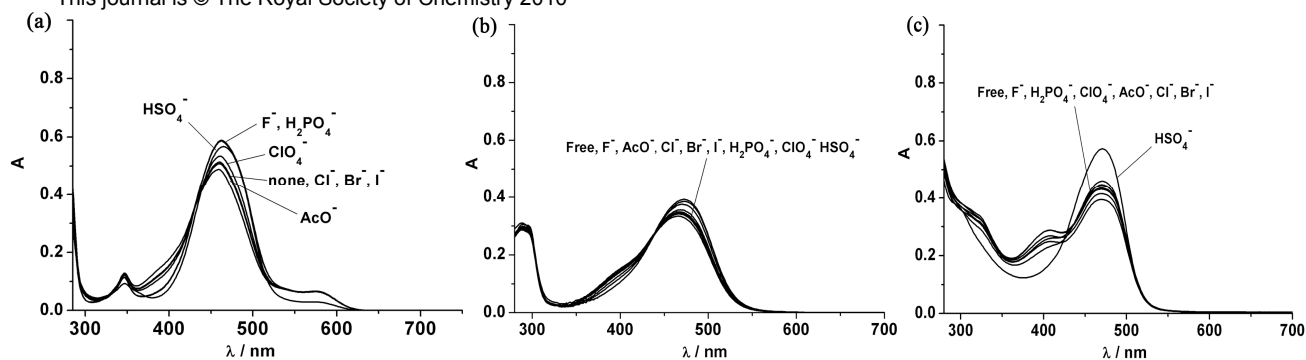

**Fig. S4.** UV-vis spectra of **1** (a), **2** (b), and **3** (c) recorded in CH<sub>3</sub>CN/H<sub>2</sub>O (4:1, v/v,  $2.5 \times 10^{-5}$  M) after addition of 25 equiv of various anions (none, F<sup>-</sup>, AcO<sup>-</sup>, Cl<sup>-</sup>, Br<sup>-</sup>, I<sup>-</sup>, HSO<sub>4</sub><sup>-</sup>, ClO<sub>4</sub><sup>-</sup>, H<sub>2</sub>PO<sub>4</sub><sup>-</sup>).

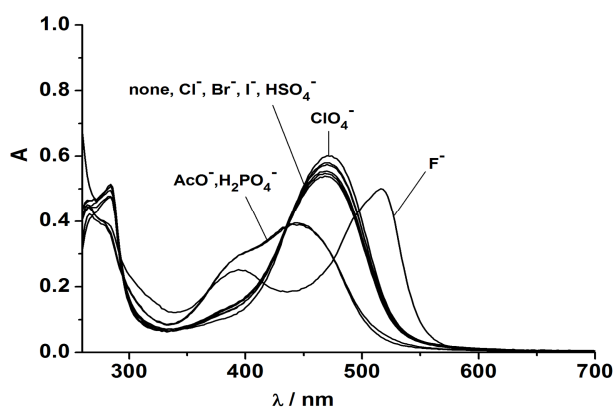

**Fig. S5.** UV-vis spectra of **1** recorded in DMSO ( $2.5 \times 10^{-5}$  M) after addition of 25 equiv of various anions (none, F<sup>-</sup>, AcO<sup>-</sup>, Cl<sup>-</sup>, Br<sup>-</sup>, I<sup>-</sup>, HSO<sub>4</sub><sup>-</sup>, ClO<sub>4</sub><sup>-</sup>, H<sub>2</sub>PO<sub>4</sub><sup>-</sup>).

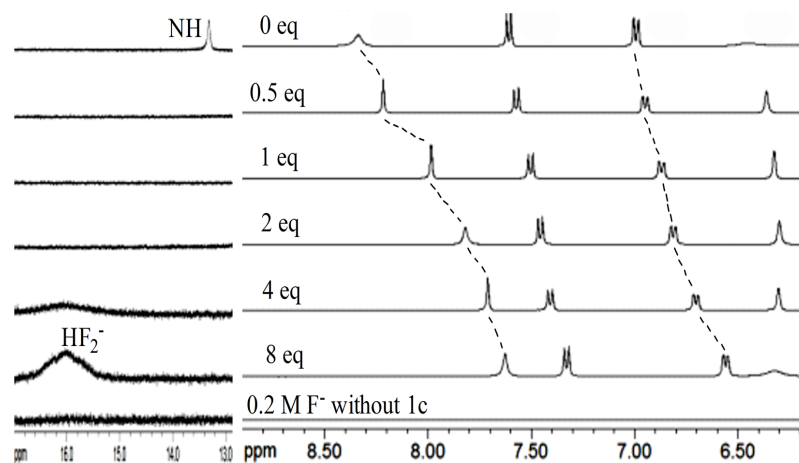

**Fig. S6.** <sup>1</sup>H NMR titration spectra of receptor **2** ( $2.5 \times 10^{-2}$  M) in DMSO-*d*<sub>6</sub> solution with F<sup>-</sup> (0, 0.5, 1, 2, 4, 8 equiv) and F<sup>-</sup> alone (bottom), the dashed lines track the shift of the H<sub>1</sub> and H<sub>3</sub> signals.

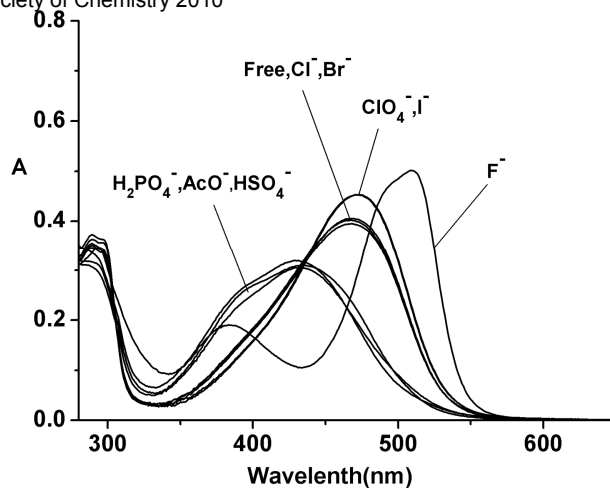

**Fig. S7.** UV-vis spectra of **2** recorded in CH<sub>3</sub>CN ( $2.5 \times 10^{-5}$  M) after addition of 25 equiv of various anions (none, F<sup>-</sup>, AcO<sup>-</sup>, Cl<sup>-</sup>, Br<sup>-</sup>, I<sup>-</sup>, HSO<sub>4</sub><sup>-</sup>, ClO<sub>4</sub><sup>-</sup>, H<sub>2</sub>PO<sub>4</sub><sup>-</sup>).

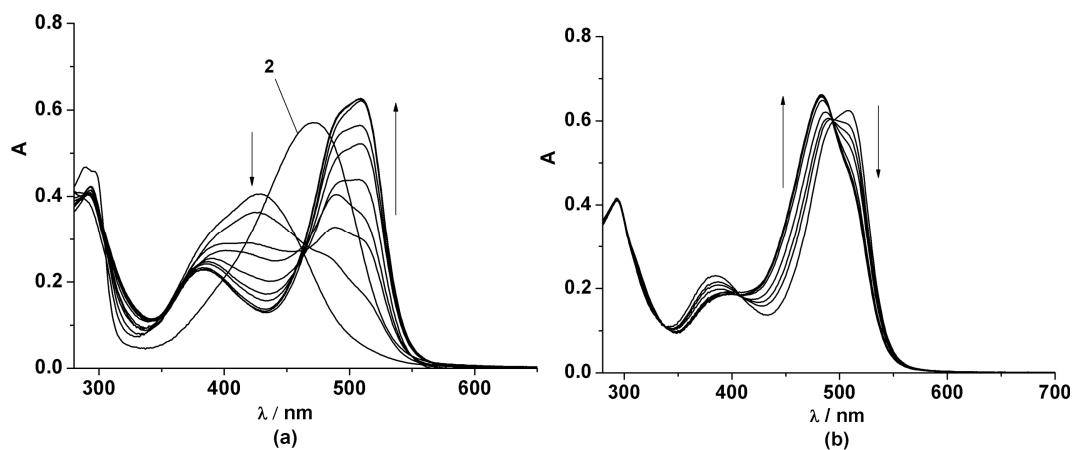

**Fig. S8.** The changes in UV-vis spectra of **2** recorded in CH<sub>3</sub>CN ( $2.5 \times 10^{-5}$  M) after addition of: (a) 0, 2, 4, 6, 8, 10, 15, 20, 30, 40, 60 equiv of F<sup>-</sup>; (b) 60, 80, 100, 120, 140, 160, 180, 200 equiv of F<sup>-</sup>.

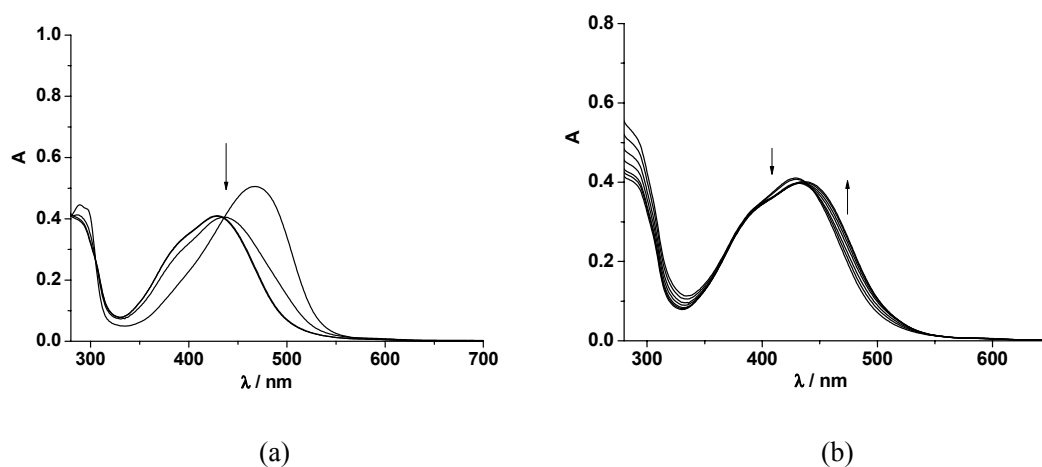

**Fig. S9.** The changes in UV-vis spectra of **2** ( $2.5 \times 10^{-5}$  M) measured in MeCN after addition of (a) 0, 0.5, 1, 2 equiv of AcO<sup>-</sup>; (b) 2, 10, 30, 60, 100, 150, 200 equiv of AcO<sup>-</sup>.

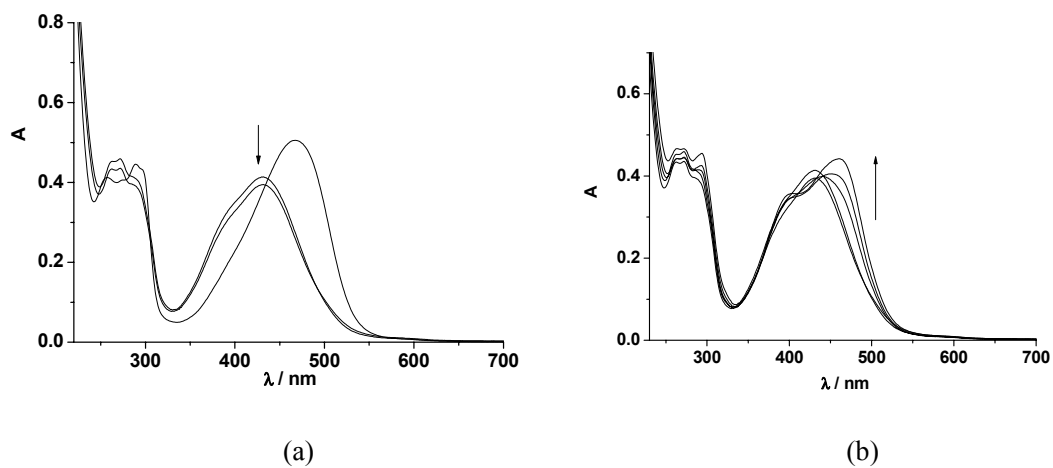

**Fig. S10.** The changes in UV-vis spectra of **2** ( $2.5 \times 10^{-5}$  M) measured in MeCN after addition of (a) 0, 0.5, 1, 2 equiv of  $\text{H}_2\text{PO}_4^-$ ; (b) 2, 10, 50, 100, 200 equiv of  $\text{H}_2\text{PO}_4^-$ .

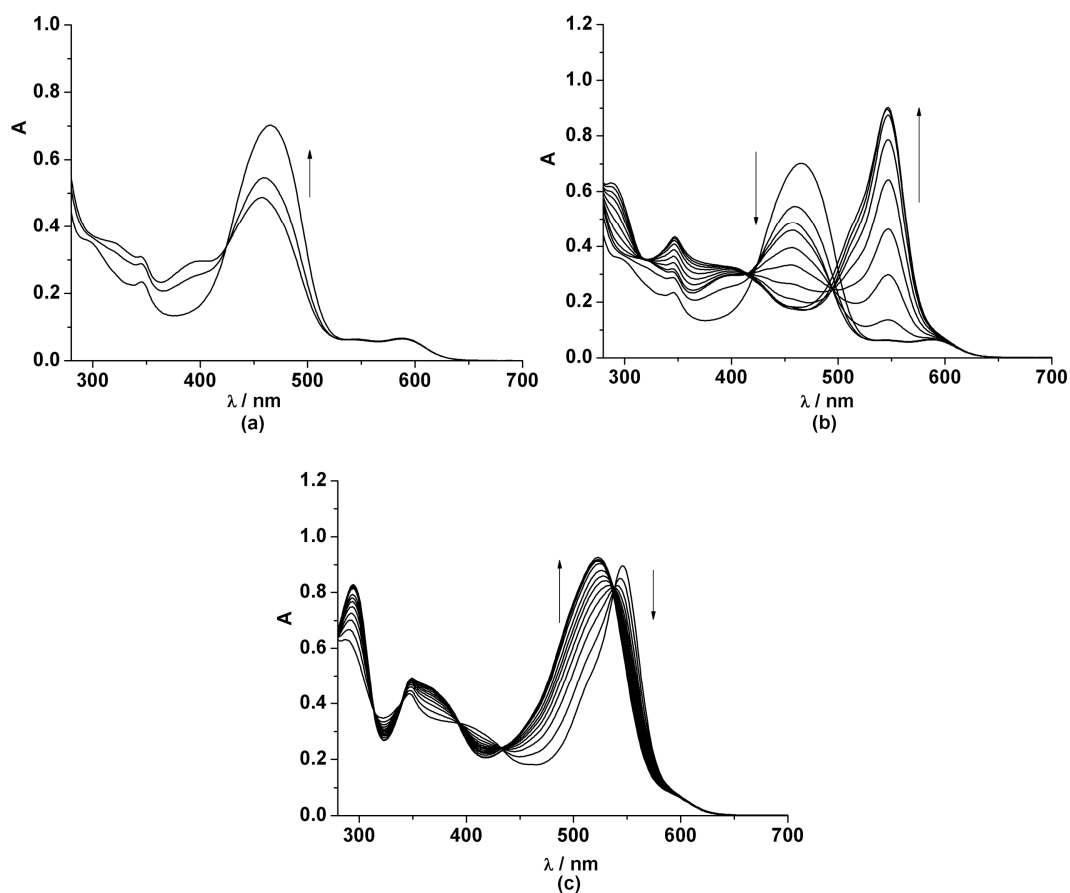

**Fig. S11.** The changes in UV-vis spectra of **3** recorded in  $\text{CH}_3\text{CN}$  ( $2.5 \times 10^{-5}$  M) after addition of: (a) 0, 0.2, 0.4 equiv of  $\text{F}^-$ ; (b) 0.4, 0.6, 0.8, 1, 1.2, 1.4, 1.6, 1.8, 2 equiv of  $\text{F}^-$ ; (c) 2, 2.5, 3, 3.5, 4, 6, 8, 10, 20, 50, 100 equiv of  $\text{F}^-$ .

### The Job's plots and the equilibrium constants of receptors 1-3 with three basic anions.

#### 1. The Job's plots of the receptors with $\text{AcO}^-$ and $\text{H}_2\text{PO}_4^-$ .

(1) Job's plot of **1** with  $\text{AcO}^-$  and  $\text{H}_2\text{PO}_4^-$  by UV-vis spectroscopy in  $\text{CH}_3\text{CN}$  at 25 °C.  $[\mathbf{1}] + [\text{Anion}] = 10^{-4}$  M.

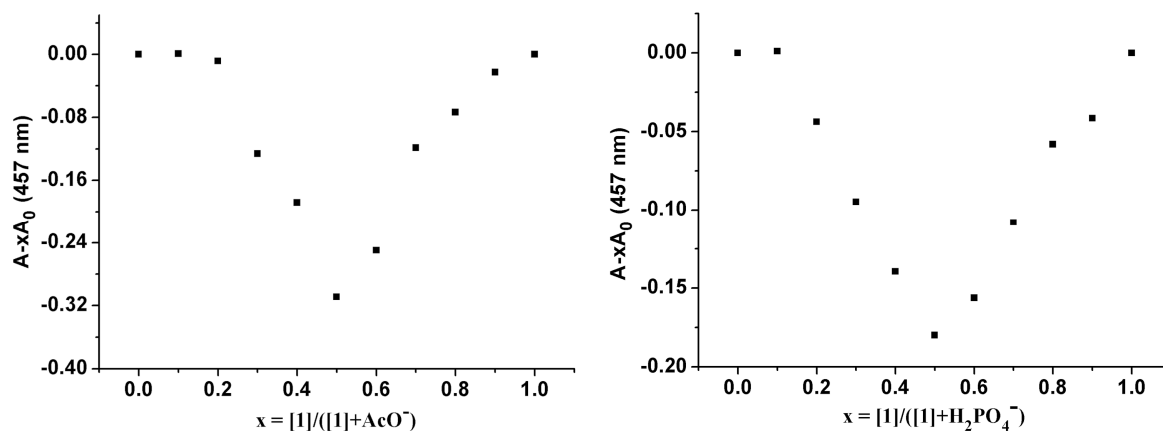

(2) Job's plot of **2** with  $\text{AcO}^-$  and  $\text{H}_2\text{PO}_4^-$  by UV-vis spectroscopy in  $\text{CH}_3\text{CN}$  at 25 °C.  $[\mathbf{2}] + [\text{Anion}] = 10^{-4}$  M.

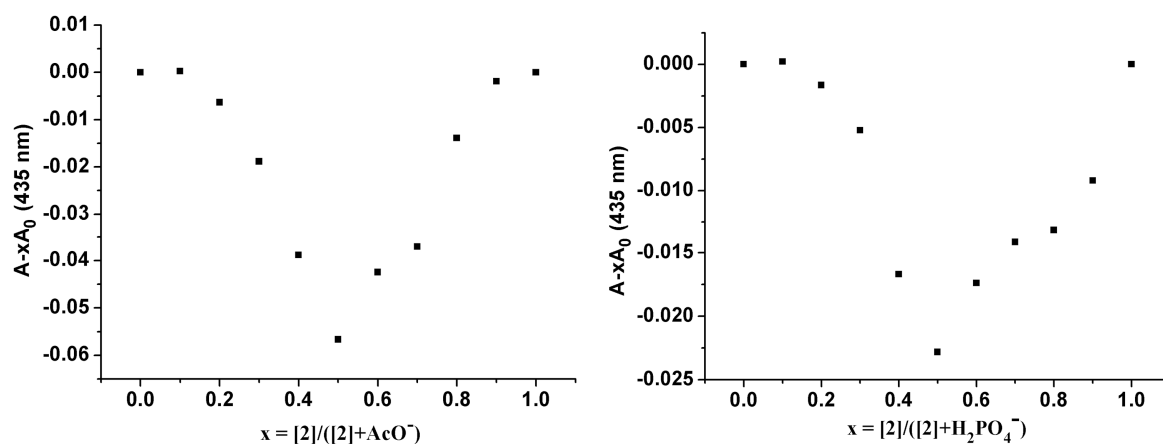

(3) Job's plot of **3** with  $\text{H}_2\text{PO}_4^-$  by UV-vis spectroscopy in  $\text{CH}_3\text{CN}$  at 25 °C.  $[\mathbf{3}] + [\text{Anion}] = 10^{-4}$  M.

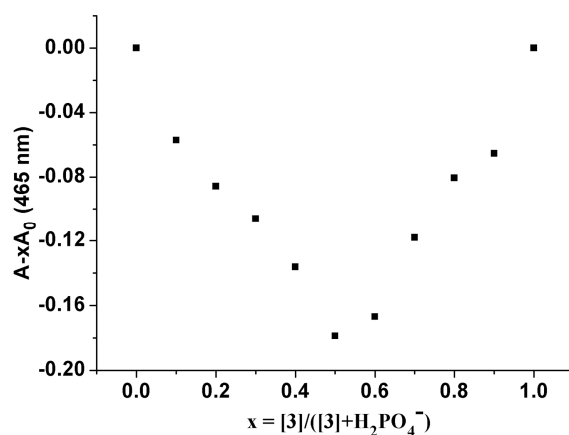



## 2. The equilibrium constants of receptors **1-3** with three basic anions.

### (1) The fitting method of the equilibrium constants.

The stepwise disassociation constants of receptors **1-3** with  $F^-$  or  $AcO^-$  were calculated according to the following two equilibria developed by Fabbrizzi's group and Gunlaugsson's group:<sup>3-4</sup>

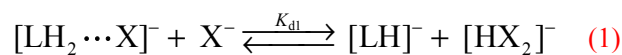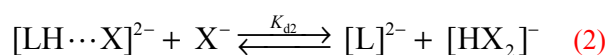

The disassociation and association constants of the receptors **1-3** with three anions were evaluated through nonlinear least squares fitting by origin software according to 1:1 stoichiometry.<sup>5</sup>

### (2) The calculated equilibrium constants of receptors **1** with three basic anions (red line represents calculated result).

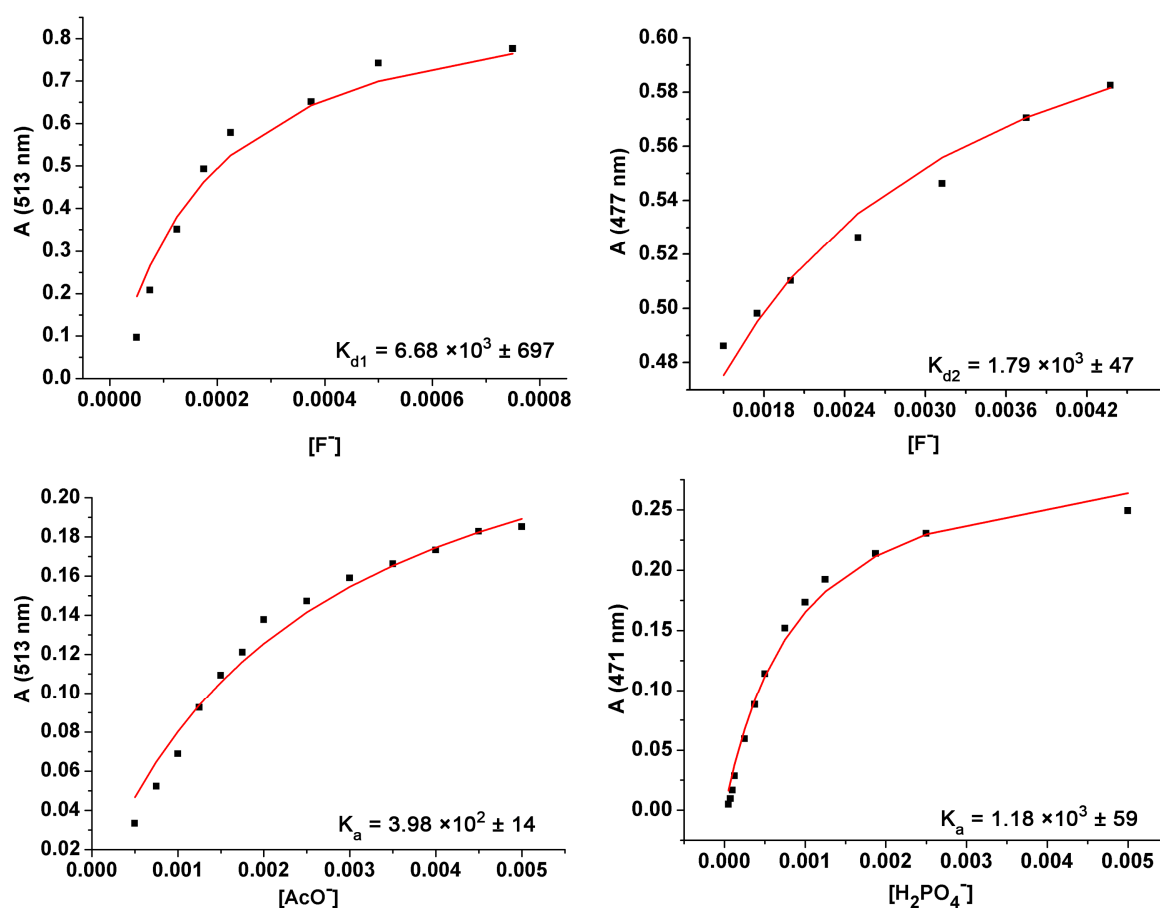

### (3) The calculated equilibrium constants of receptors **2** with three basic anions (red line represents calculated result).

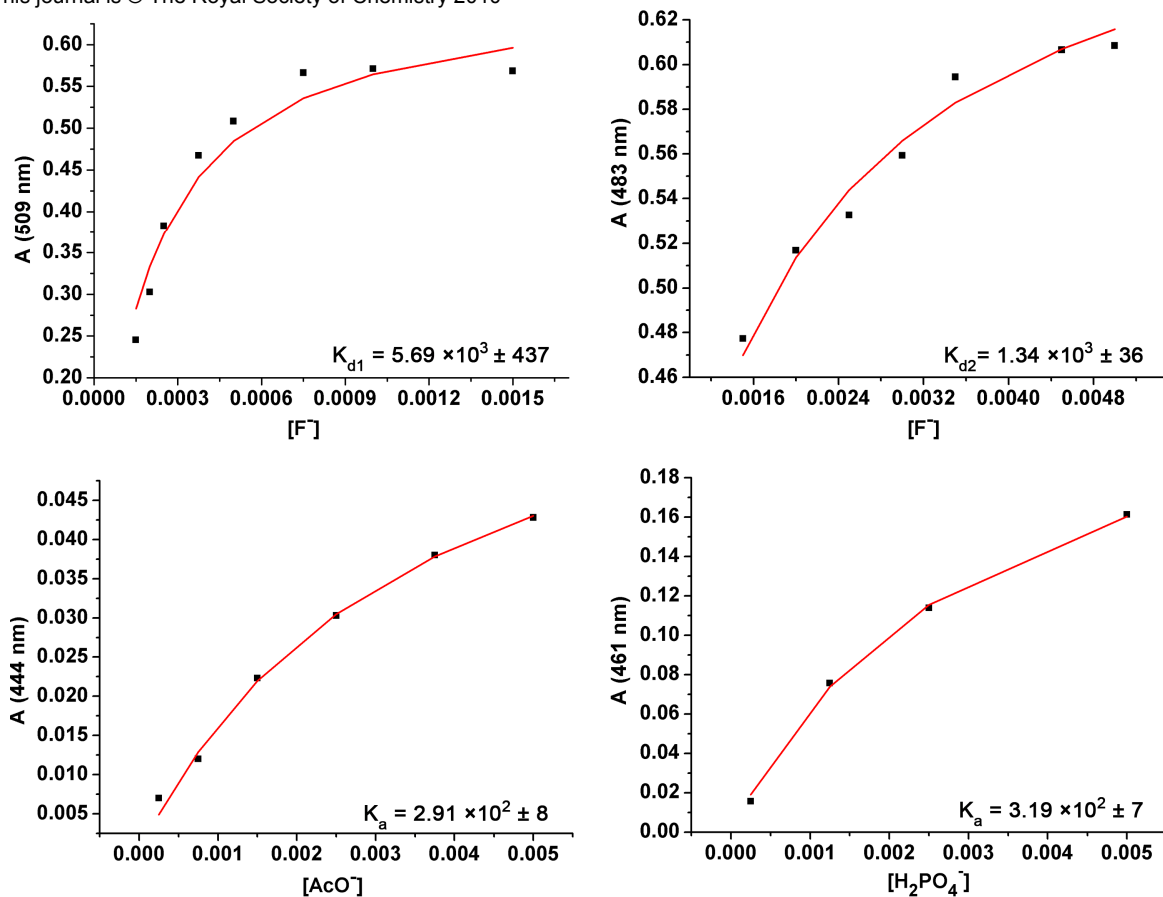

(4) The calculated equilibrium constants of receptors 3 with three basic anions (red line represents calculated result).

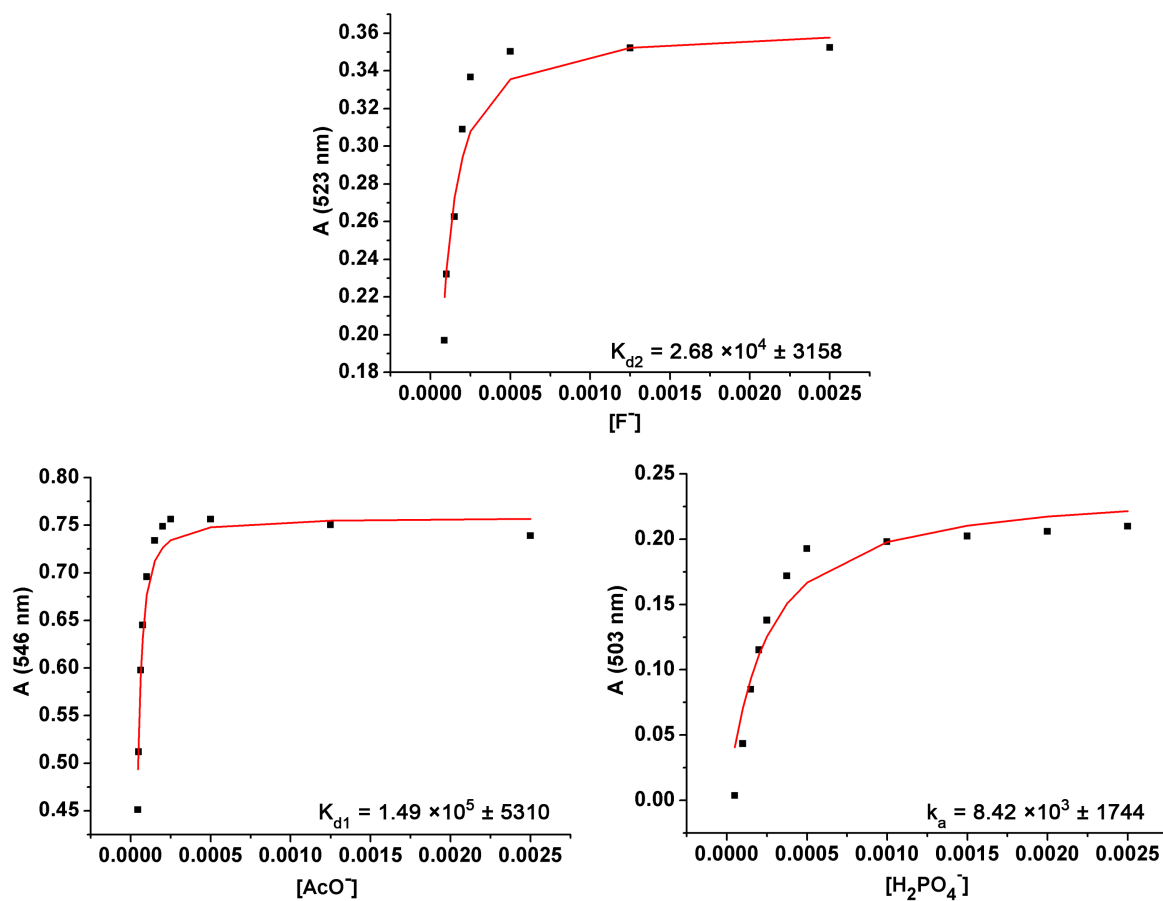



**<sup>1</sup>H NMR spectra of 3a (400MHz, DMSO-d<sub>6</sub>)**

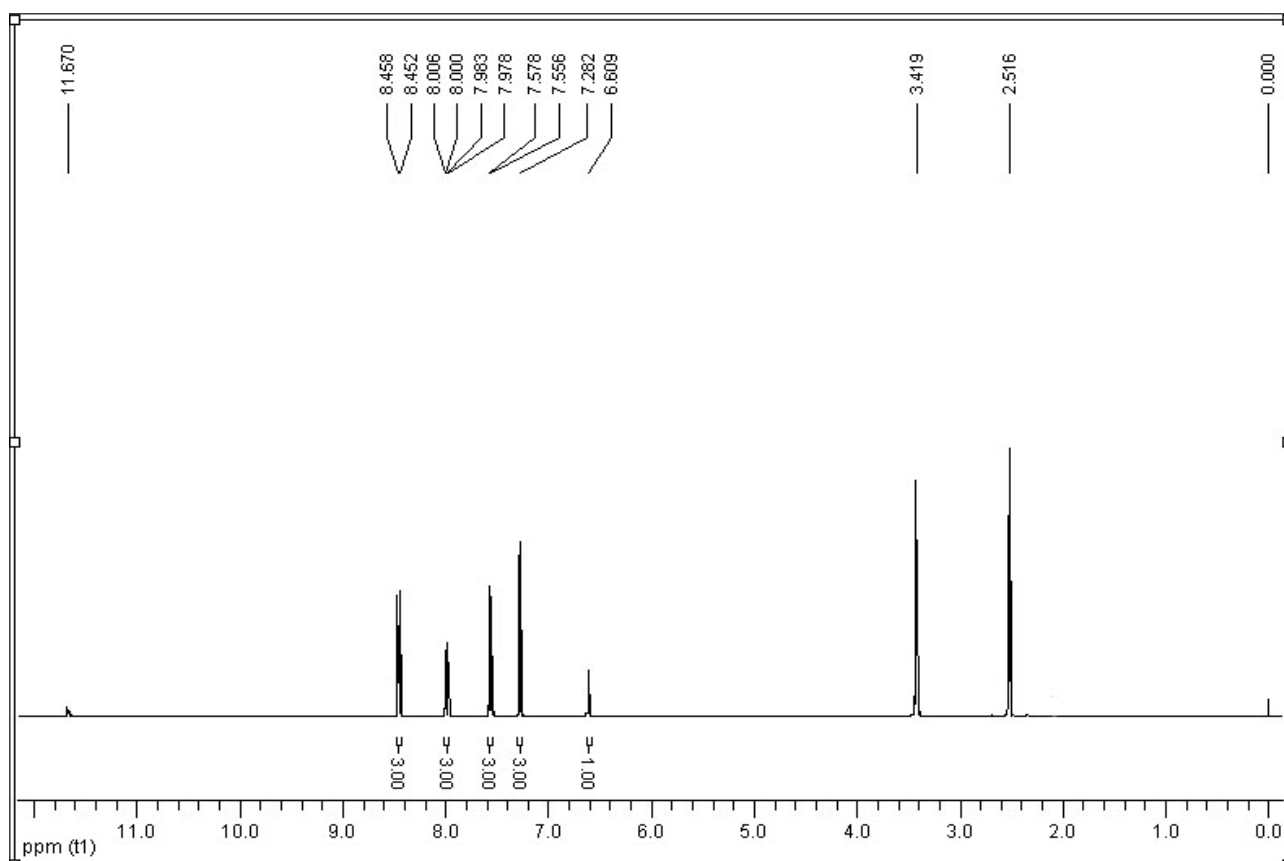

**<sup>1</sup>H NMR spectra of 1 (400MHz, DMSO-d<sub>6</sub>)**

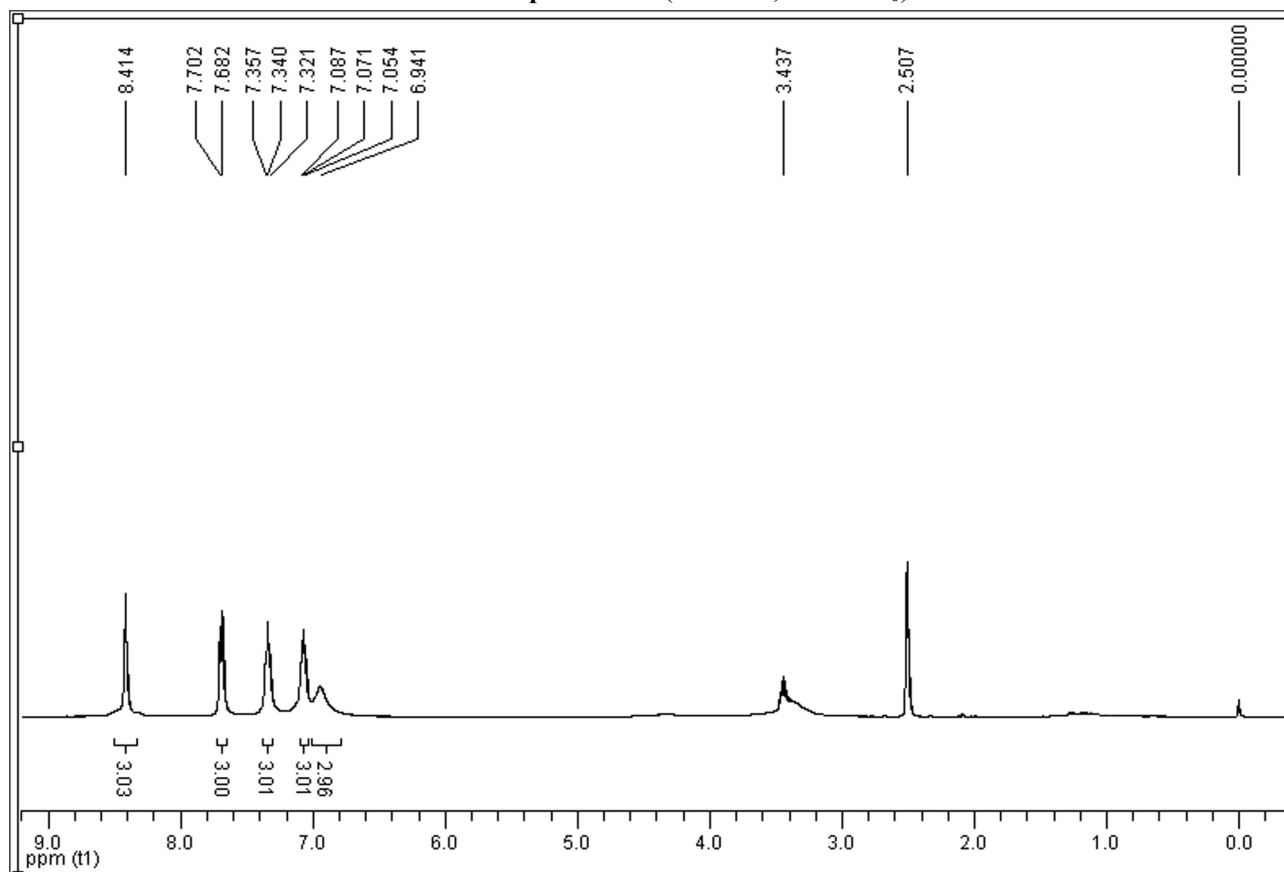

**<sup>1</sup>H NMR of spectra of 2 (400MHz, DMSO-*d*<sub>6</sub>)**

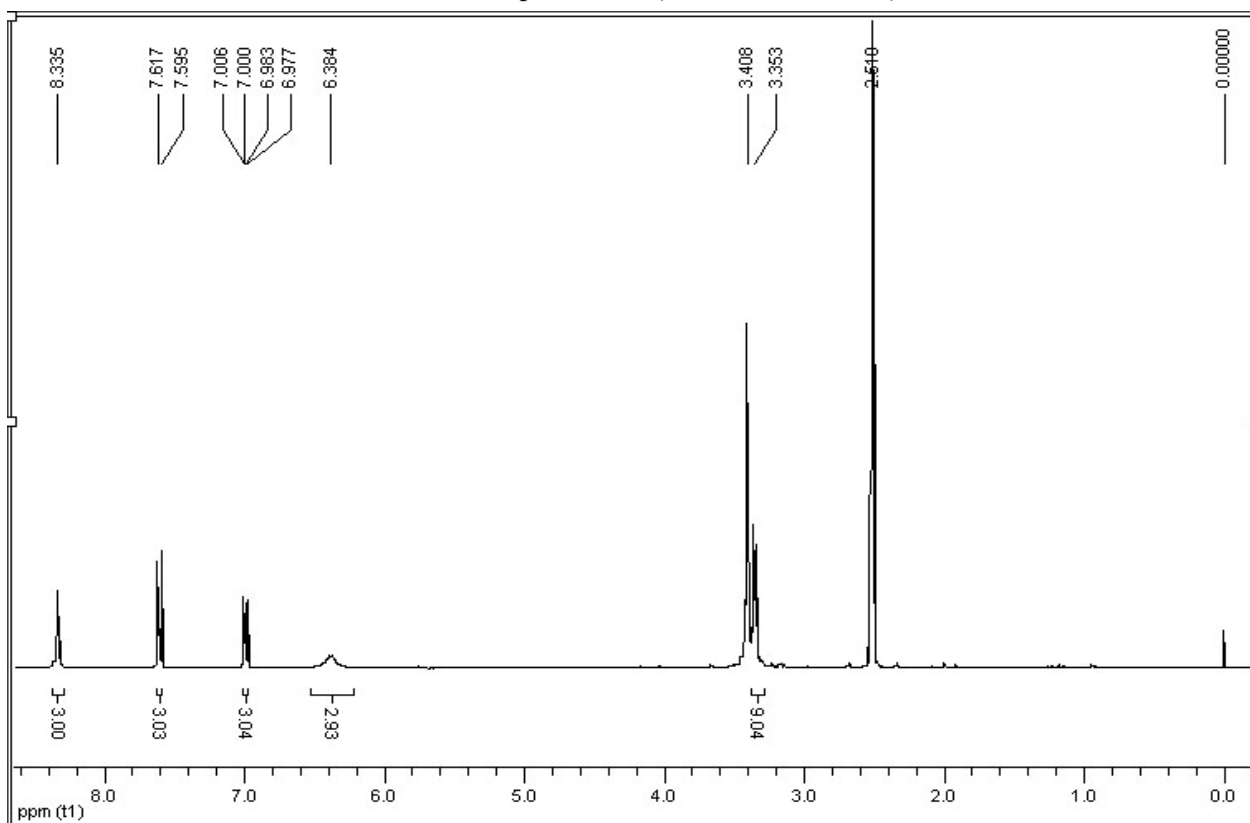

**<sup>1</sup>H NMR spectra of 3 (400MHz, DMSO-*d*<sub>6</sub>)**

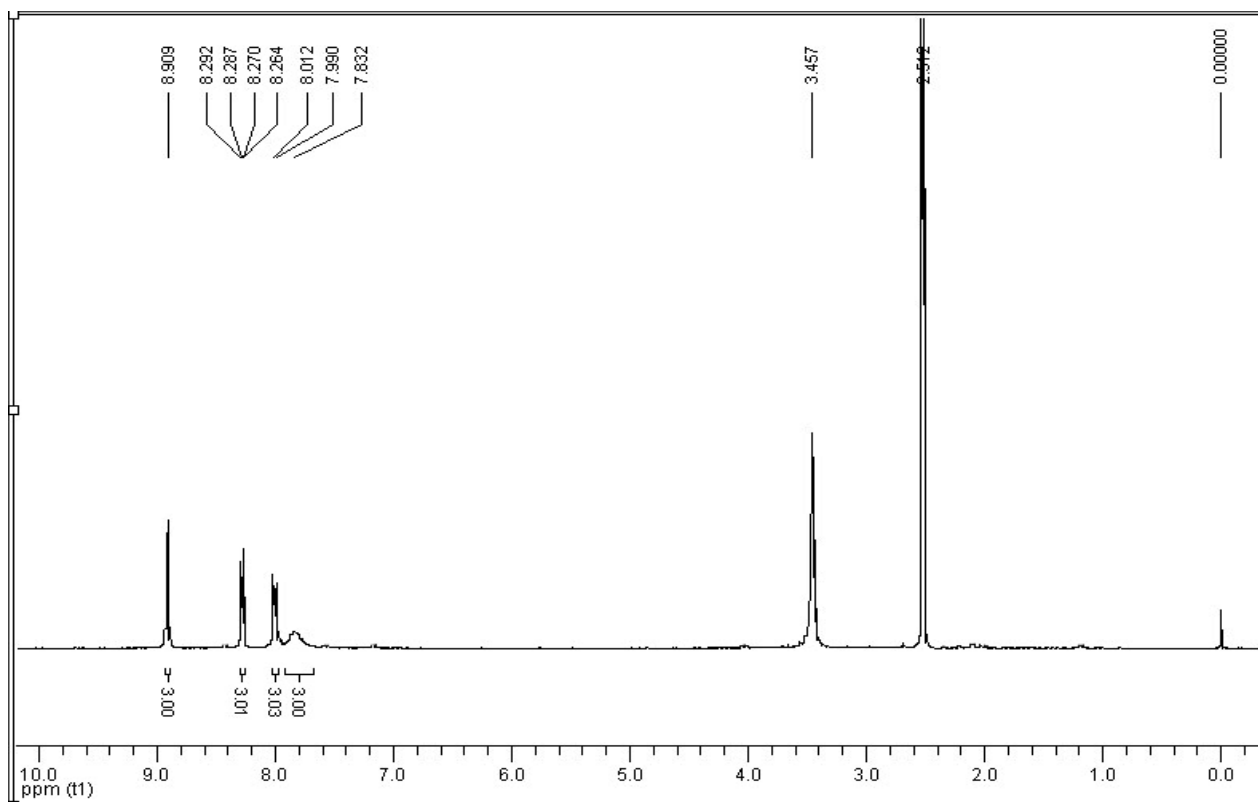

### $^{13}\text{C}$ NMR spectra of 1-3

$^{13}\text{C}$  NMR of spectra of 1 (400MHz, DMSO- $d_6$ )

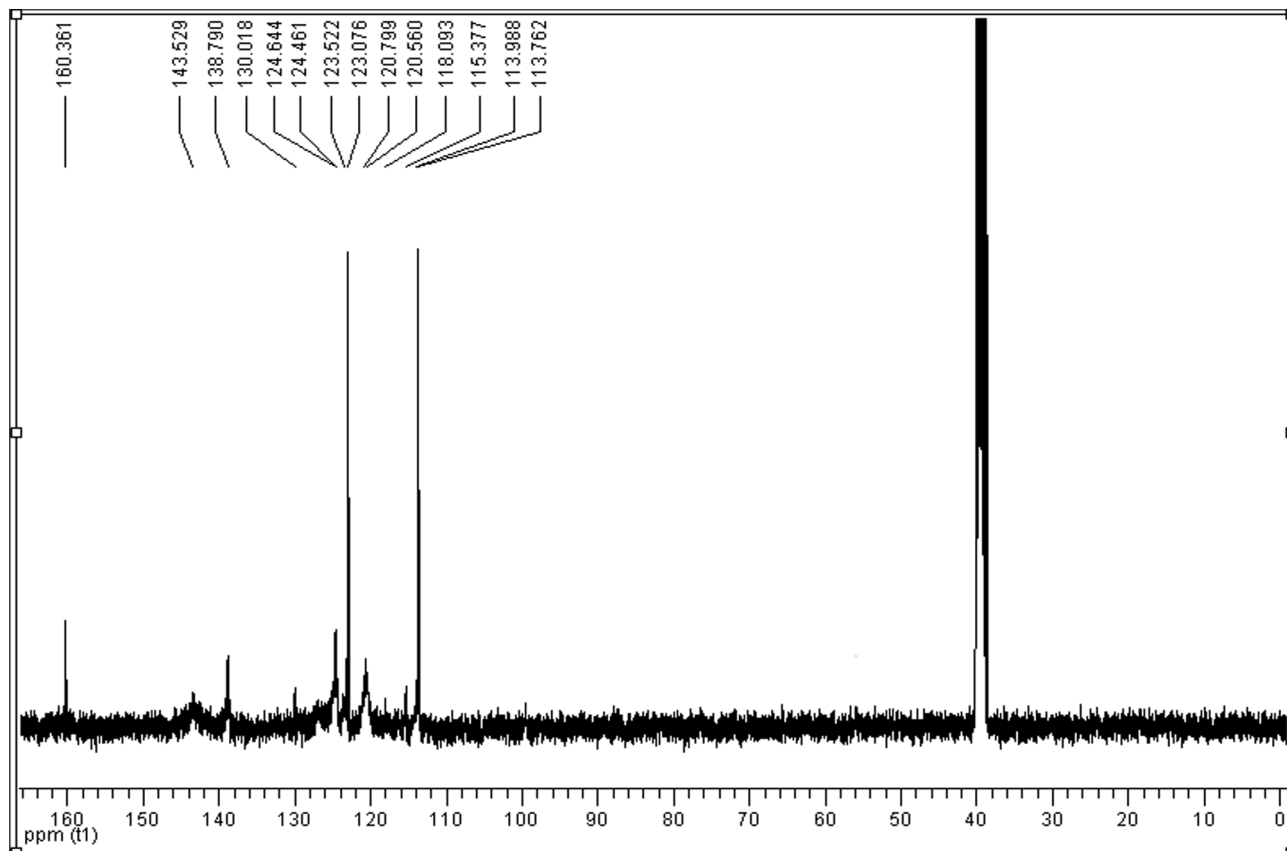

$^{13}\text{C}$  NMR of spectra of 2 (400MHz, DMSO- $d_6$ )

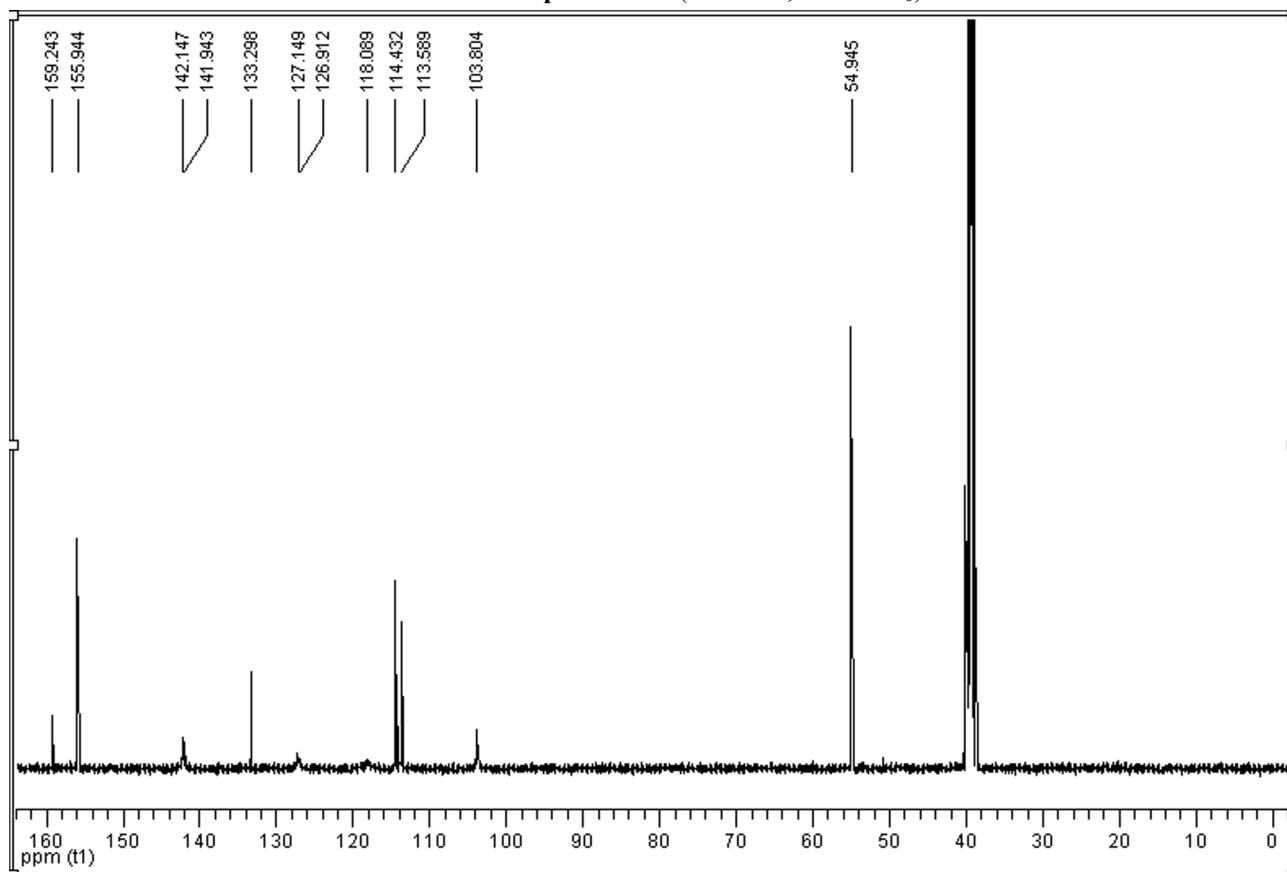

<sup>13</sup>C NMR of spectra of 3 (400MHz, DMSO-*d*<sub>6</sub>)

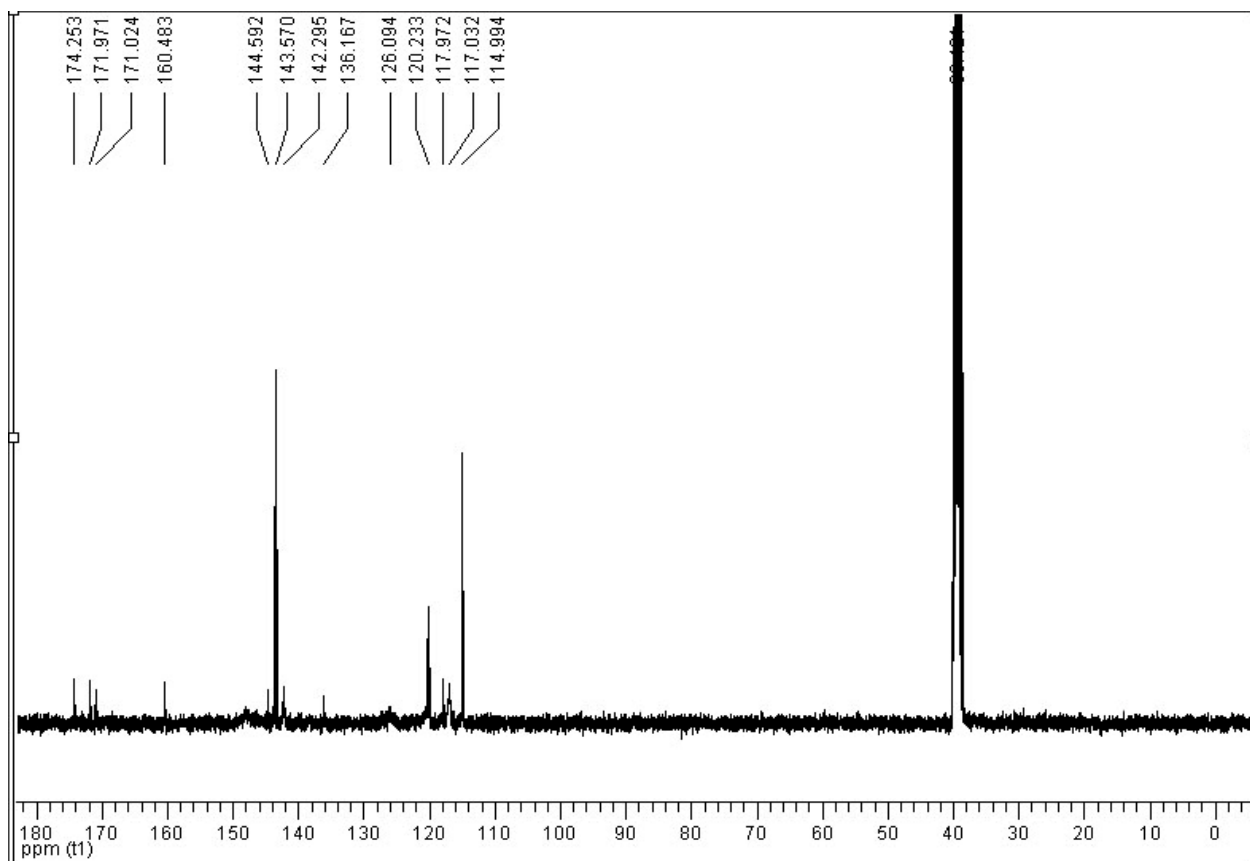

## References:

1. H. J. Kim, S. Bhuniya, R. K. Mahajan, R. Puri, H. Liu, K. C. Ko, J. Y. Lee and J. S. Kim, *Chem. Commun.*, 2009, 7128-7130.
2. S.-i. Kondo, T. Kinjo and Y. Yano, *Tetrahedron Lett.*, 2005, **46**, 3183-3186.
3. V. Amendola, D. Esteban-Gomez, L. Fabbrizzi and M. Licchelli, *Acc. Chem. Res.*, 2006, **39**, 343-353.
4. T. Gunnlaugsson, M. Glynn, G. M. Tocci, P. E. Kruger and F. M. Pfeffer, *Coord. Chem. Rev.*, 2006, **250**, 3094-3117.
5. B. Valeur, J. Pouget, J. Bourson, M. Kaschke and N. P. Ernsting, *J. Phys. Chem.*, 1992, **96**, 6545.
